# Supplementary material for: Luminescent hybrid composites based on the intercalation of Eu(iii) complexes into α-zirconium phosphate nanoplatelets: preparation, characterization and amine sensing
Source: Royal Society of Chemistry journal article supplement (doi:10.1039/c7nj02404e), 2017-01-01
Supplement: c7nj02404e1.pdf [file c7nj02404e1.pdf]

## Supporting Information

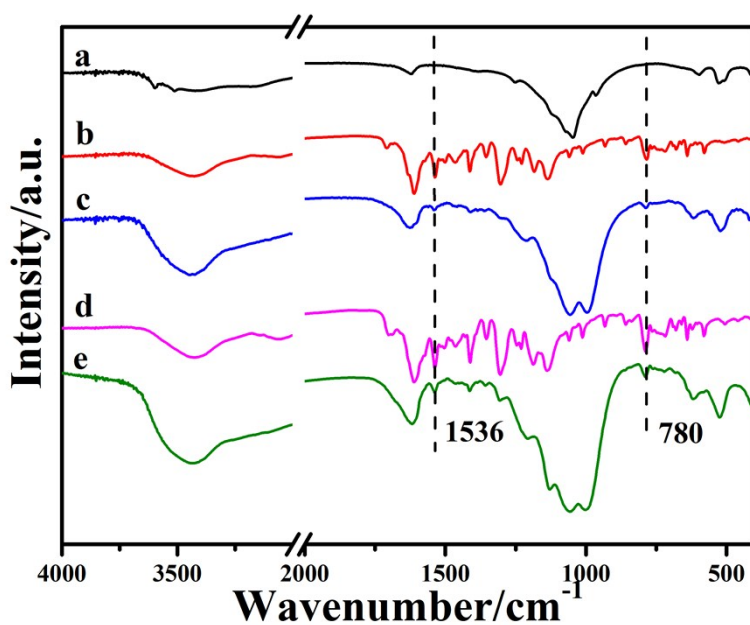

Figure S1. FTIR spectrum of  $\alpha$ -ZrP (a), 2 (b), ZrPB-0.5 (c), 1 (d), ZrPA-0.5 (e).

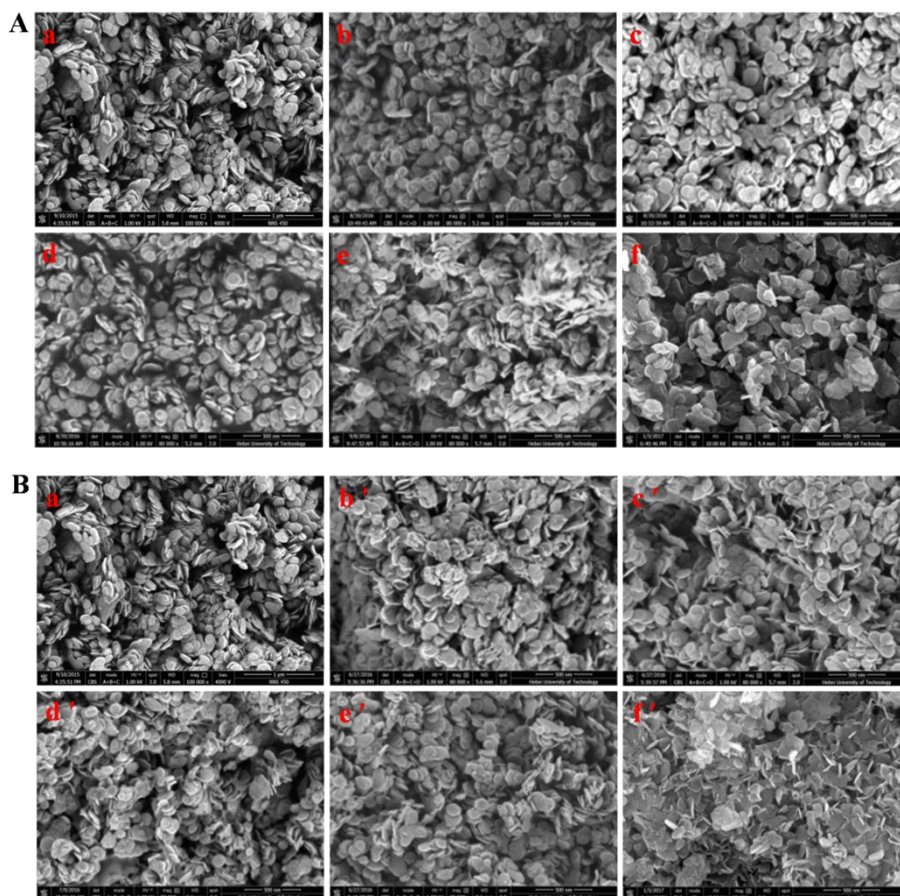

Figure S2. SEM image of the intercalation compounds.

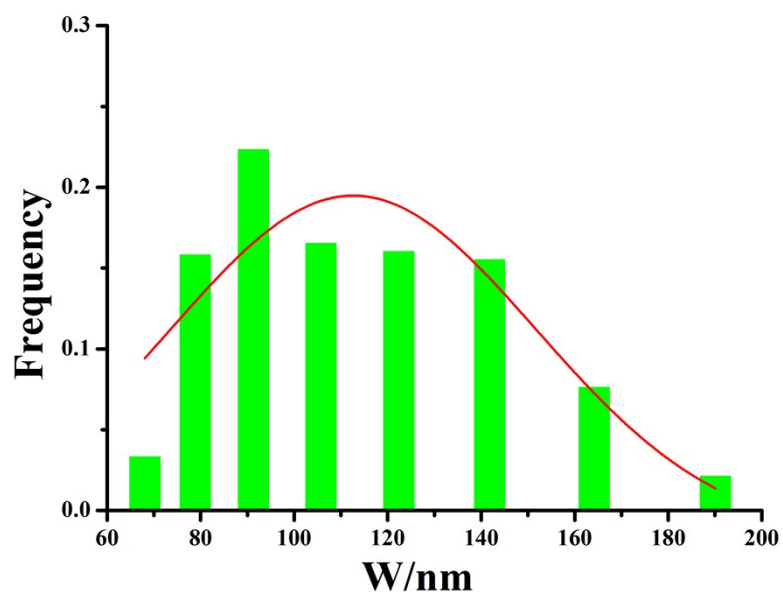

**Figure S3.** The hydrodynamic diameter of ZrP dispersed in water measured with the DLS method.

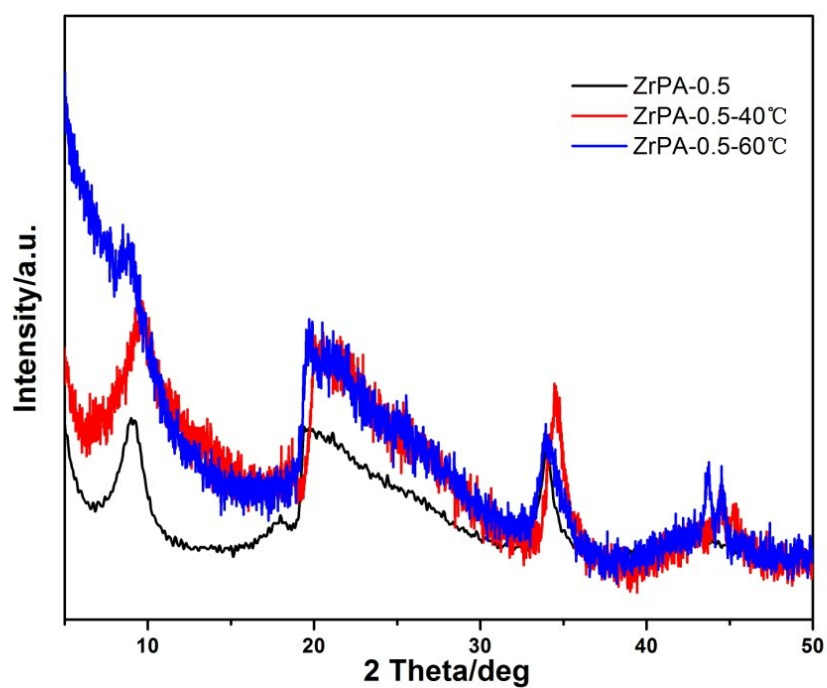

**Figure S4.** XRD patterns of ZrPA-0.5 before and after heating at 40/60 °C for 30 min.

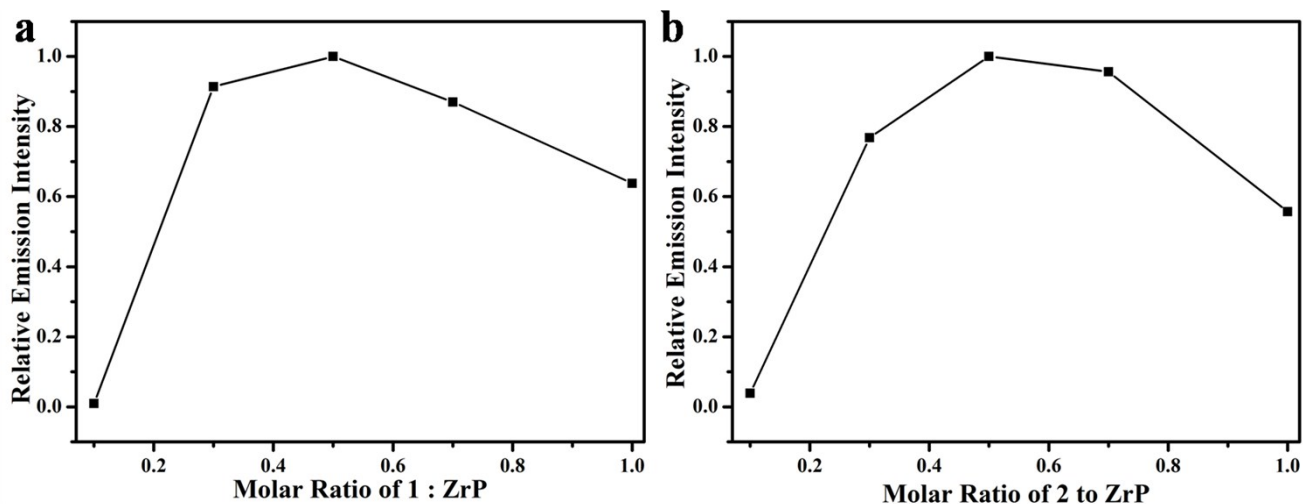

**Figure S5.** Luminescence intensity at 614 nm versus the amount of 1 (a) and 2 (b) initially added to the reaction mixture containing ZrP.

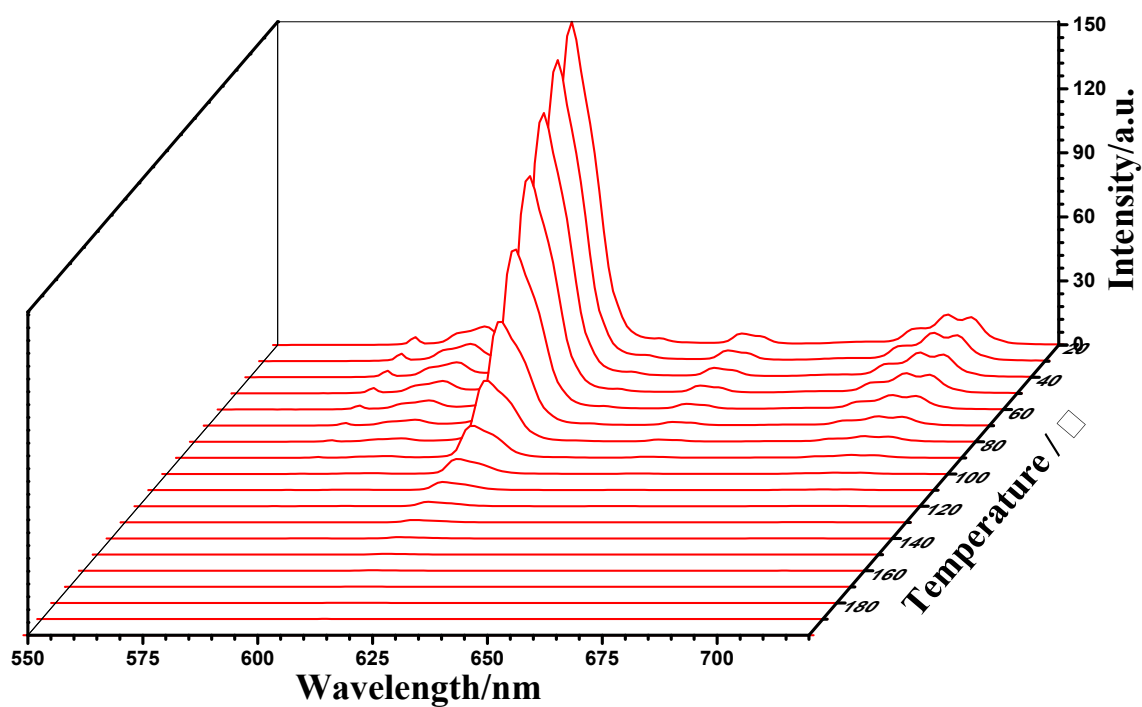

**Figure S6.** Temperature-dependent emission spectra of ZrPA-0.5 (at 375 nm excitation).

**Table S1.** Variation of decay time of ZrPA-0.5 and **1** under UV irradiation

| Time/h                            | 0    | 2    | 4    | 6    | 8    | 10   |
|-----------------------------------|------|------|------|------|------|------|
| $\tau(\text{ZrPA-0.5})/\text{ms}$ | 0.53 | 0.53 | 0.51 | 0.53 | 0.51 | 0.53 |
| $\tau(\mathbf{1})/\text{ms}$      | 0.54 | 0.55 | 0.54 | 0.54 | 0.53 | 0.54 |

**Table S2.** Variation of decay time of ZrPB-0.5 and **2** under UV irradiation

| Time/h                            | 0    | 2    | 4    | 6    | 8    | 10   |
|-----------------------------------|------|------|------|------|------|------|
| $\tau(\text{ZrPB-0.5})/\text{ms}$ | 0.55 | 0.54 | 0.53 | 0.54 | 0.55 | 0.53 |
| $\tau(\mathbf{2})/\text{ms}$      | 0.57 | 0.56 | 0.55 | 0.56 | 0.56 | 0.56 |

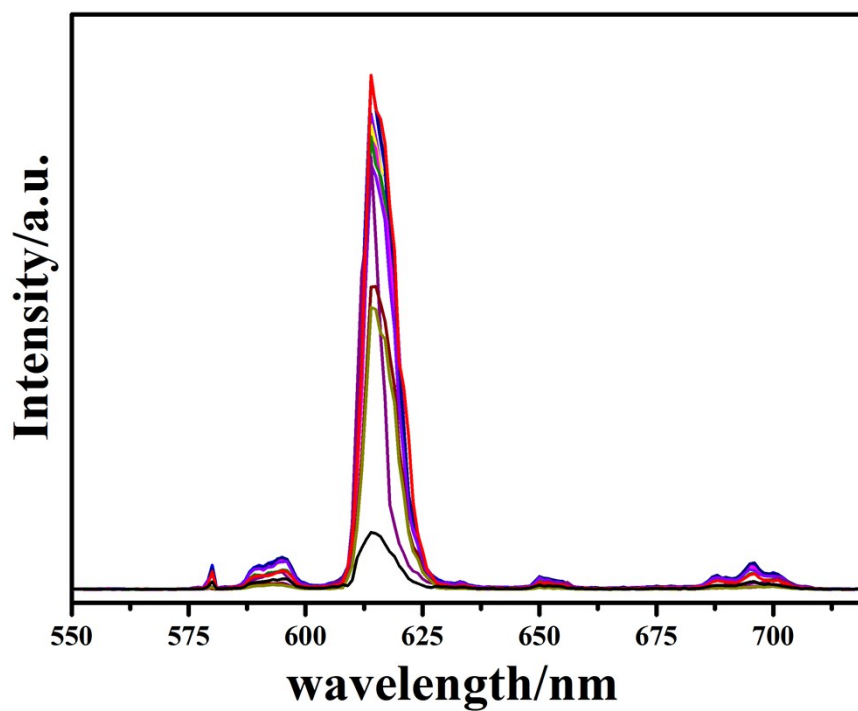**Figure S7.** Emission spectra of ZrPA upon contact with various amine solvent vapors.

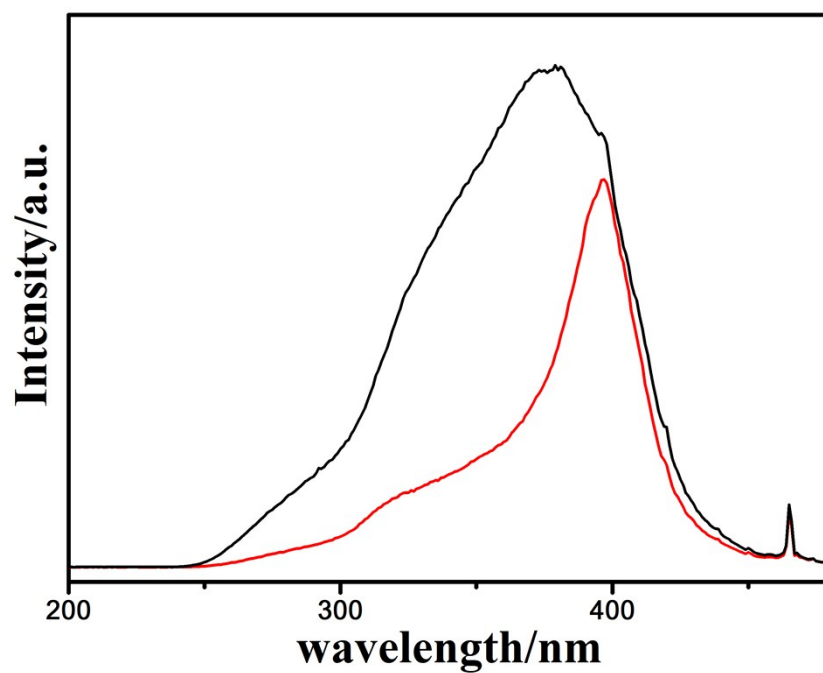

**Figure S8.** Excitation spectra of ZrPA before (black line) and after exposure to En (red line).

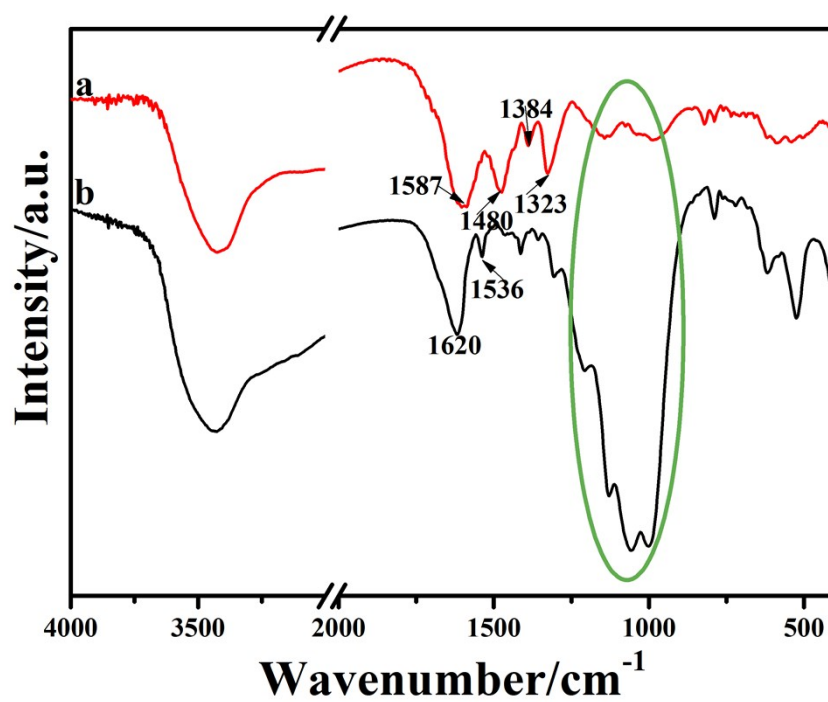

**Figure S9.** FTIR spectra of ZrPA after exposure to En (a), and ZrPA (b).
